# Supplementary material
Source: Springer Nature journal article supplement (https://www.springermedizin.de/resource/supplementary/12943_2013_1107_MOESM2_ESM.pdf/9552516)

**A**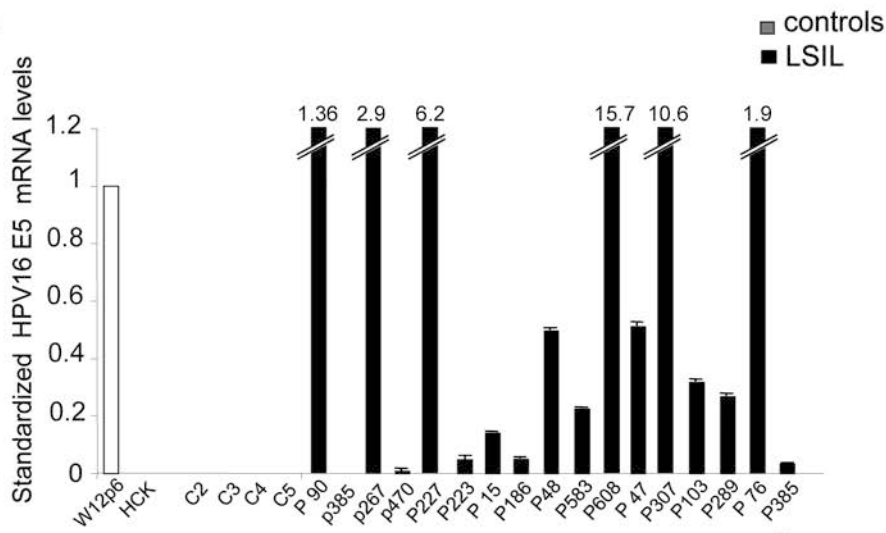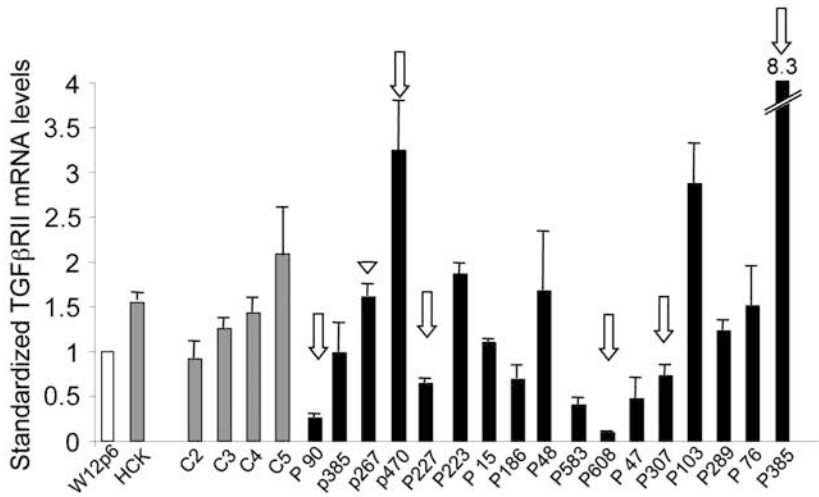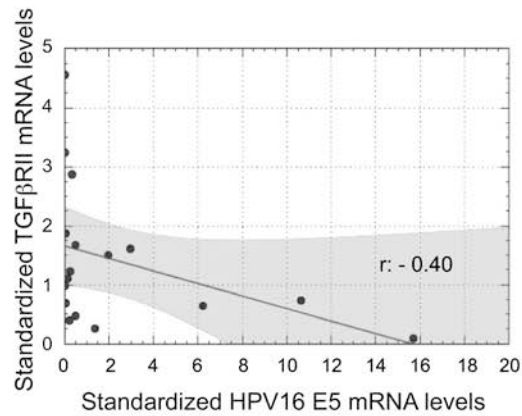**B**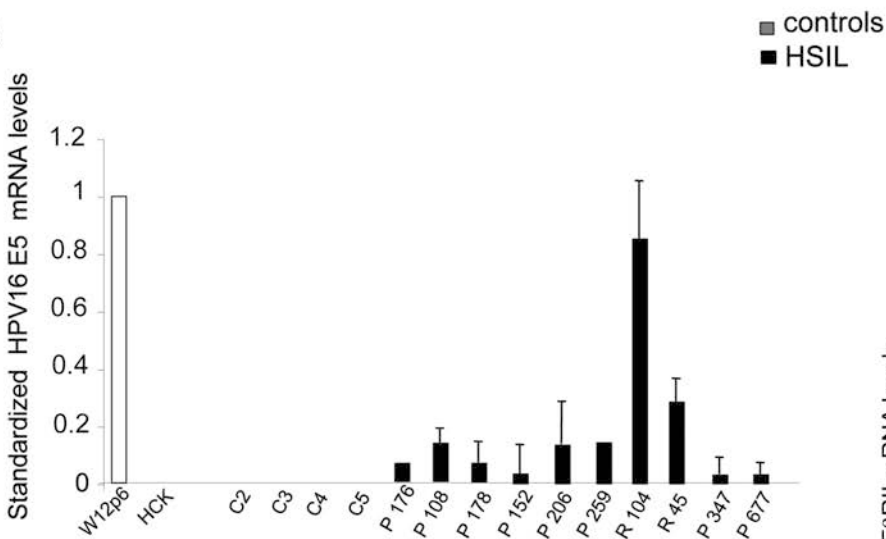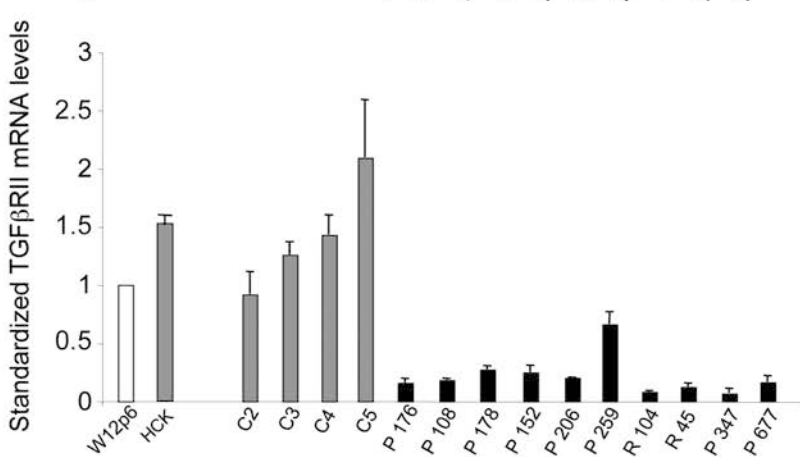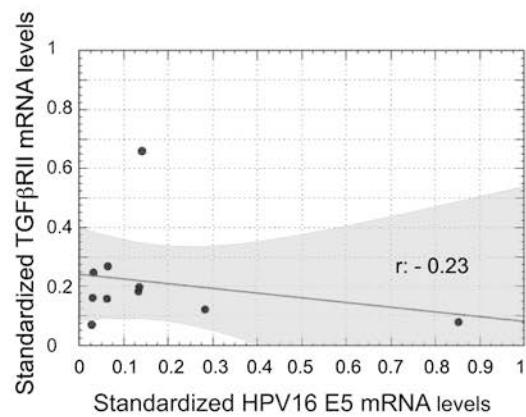

Supplement: MOESM2 [file 9552516]
